# Supplementary material
Source: Springer Nature journal article supplement (https://www.springermedizin.de/resource/supplementary/12879_2004_156_MOESM2_ESM.pdf/9448458)

M 1 2 3 4 5 6 7 8 9 10 11 12 13 14 M

bp  
1500  
500  
200

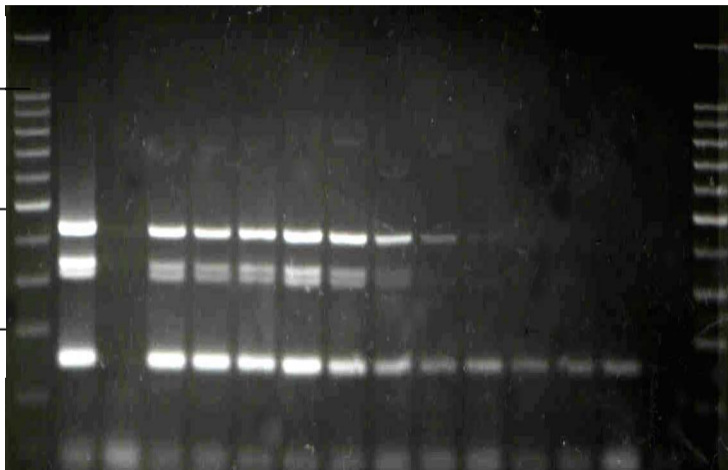

Supplement: MOESM2 [file 9448458]
